# Supplementary material for: Metal Removal from Nickel-Containing Effluents Using Mineral–Organic Hybrid Adsorbent
Source: MDPI journal article supplement (doi:10.3390/ma13194462), 2020-10-08
Supplement: s1 [file s1]

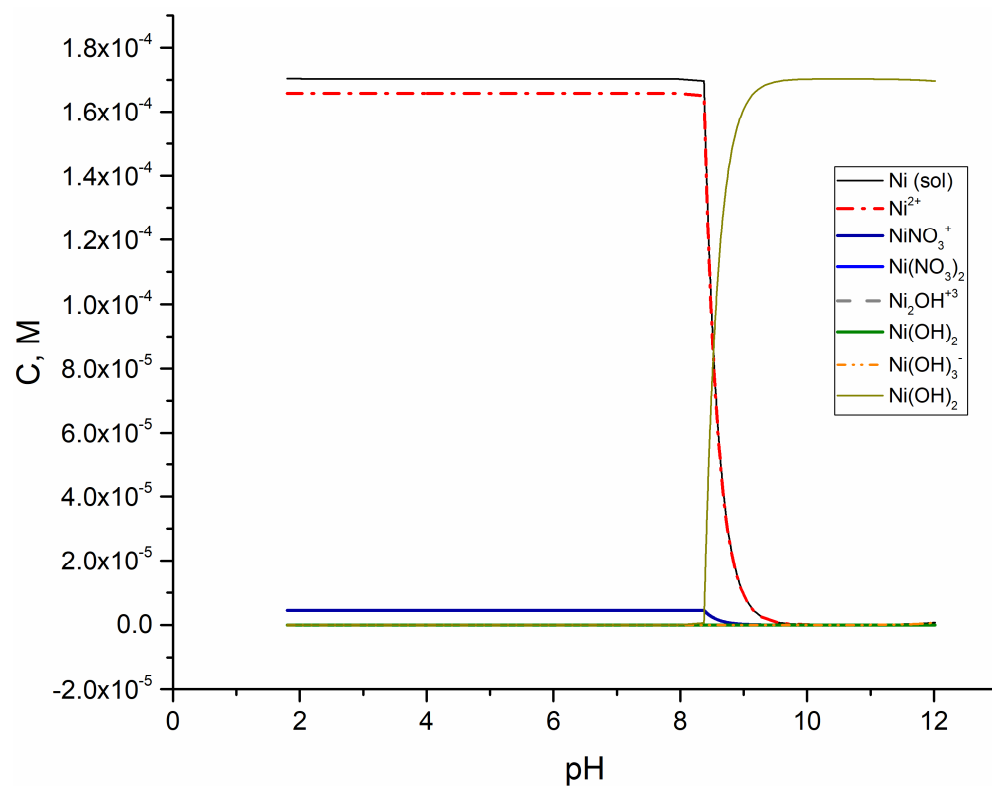

**Figure S1.** The thermodynamic speciation of Ni(II) ions in Ni(II) system as a function of pH.

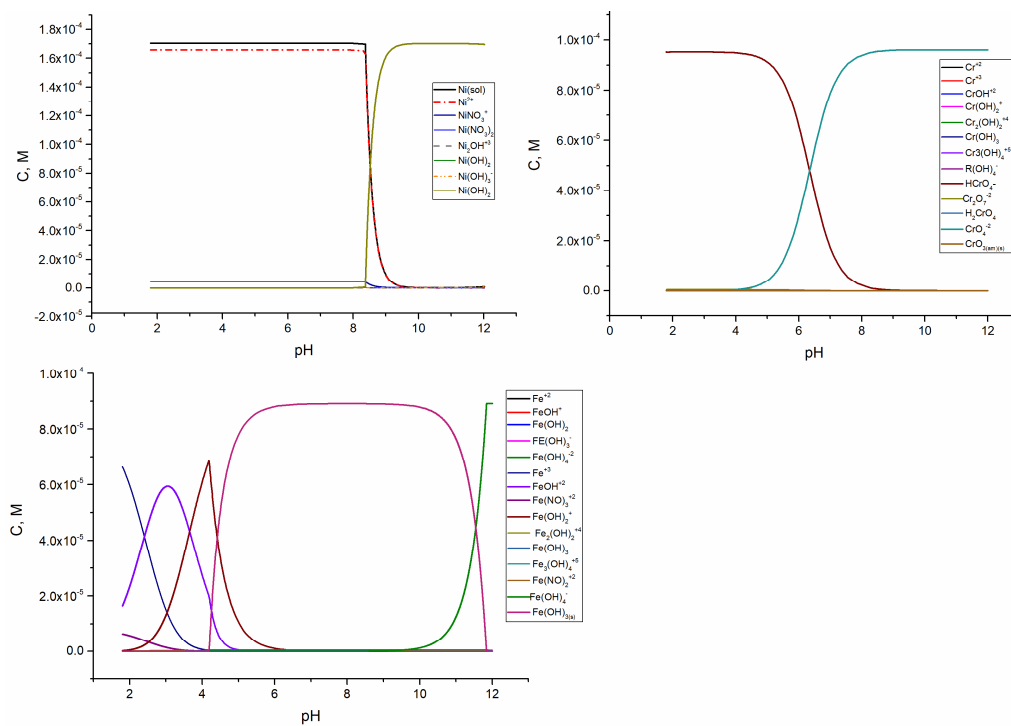

**Figure S2.** The thermodynamic speciation of metal ions in Ni(II)-Cr(III)-Fe(III) system as a function of pH.

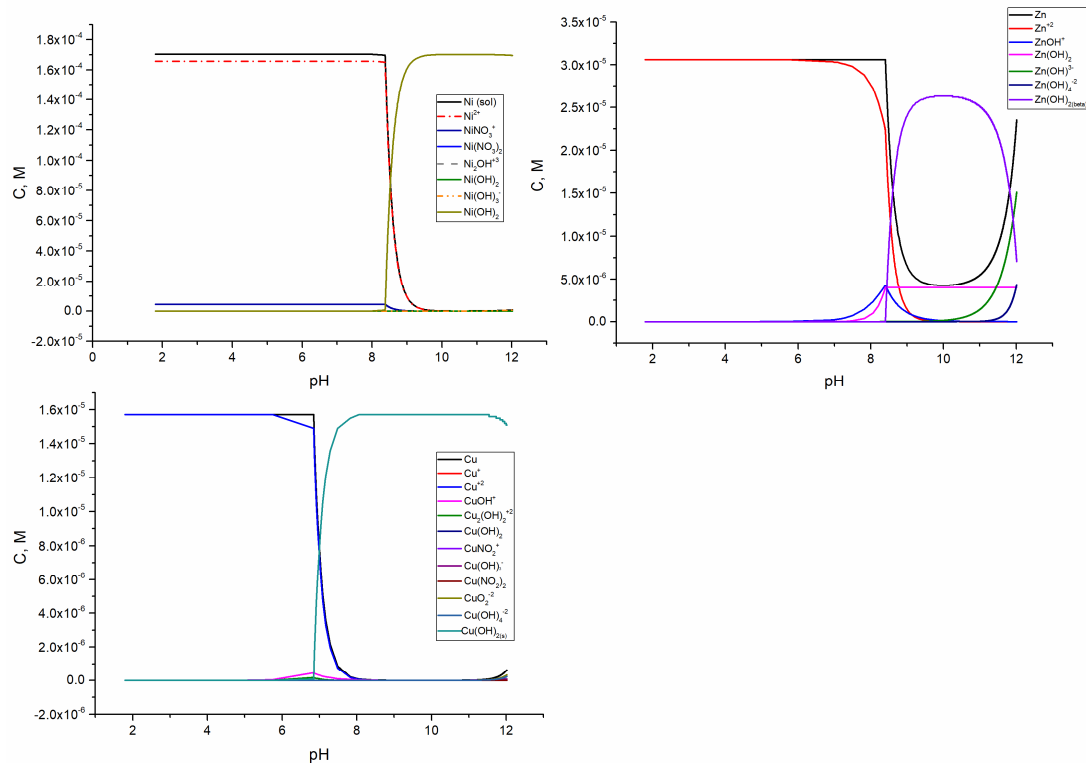

**Figure S3.** The thermodynamic speciation of metal ions in Ni(II)-Cu(II)-Sr(II)-Zn(II) system as a function of pH.

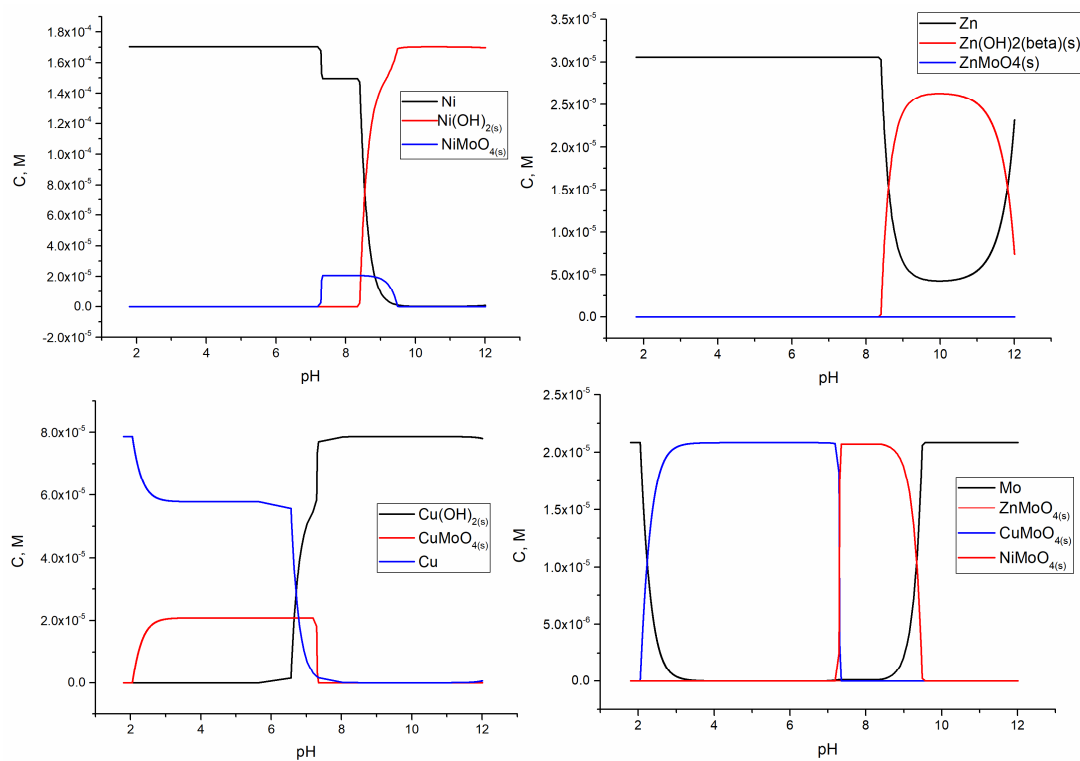

**Figure S4.** The thermodynamic speciation of metal ions in Ni(II)-Zn(II)-Mo(VI)-Cu(II) system as a function of pH.

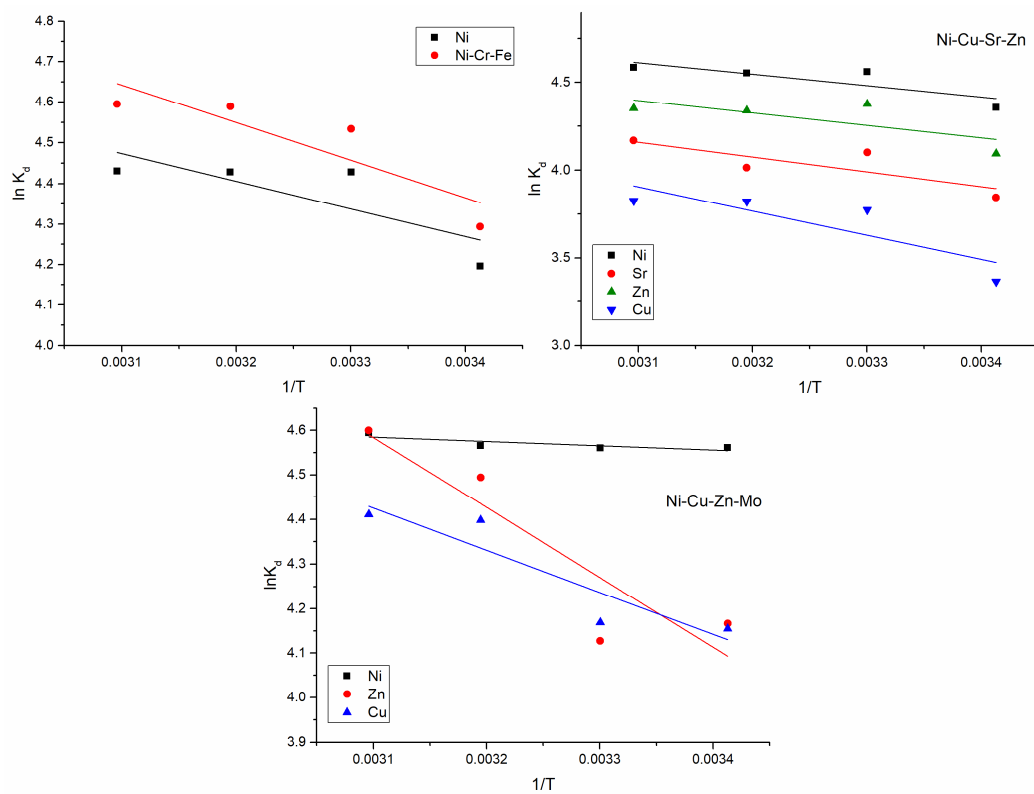Figure S5.  $\ln K_a$  versus  $1/T$ .
